# Supplementary material
Source: HighWire-hosted journal article supplement (https://jnm.snmjournals.org/highwire/filestream/94274/field_highwire_adjunct_files/0/92833_Supplemental_Data.pdf)
Supplement: 92833_Supplemental_Data.pdf [file 92833_Supplemental_Data.pdf]

### **Supplemental Video 1**

Video of the fluorescence signal of trastuzumab-800CW captured by the intra-operative camera system during surgical removal of sc SK-BR-3 tumor.

## **Supplemental Video 2**

Video of the fluorescence signal of bevacizumab-800CW captured by the intra-operative camera system during surgical removal of ip SKOV-3<sup>luc+</sup> tumor spots.

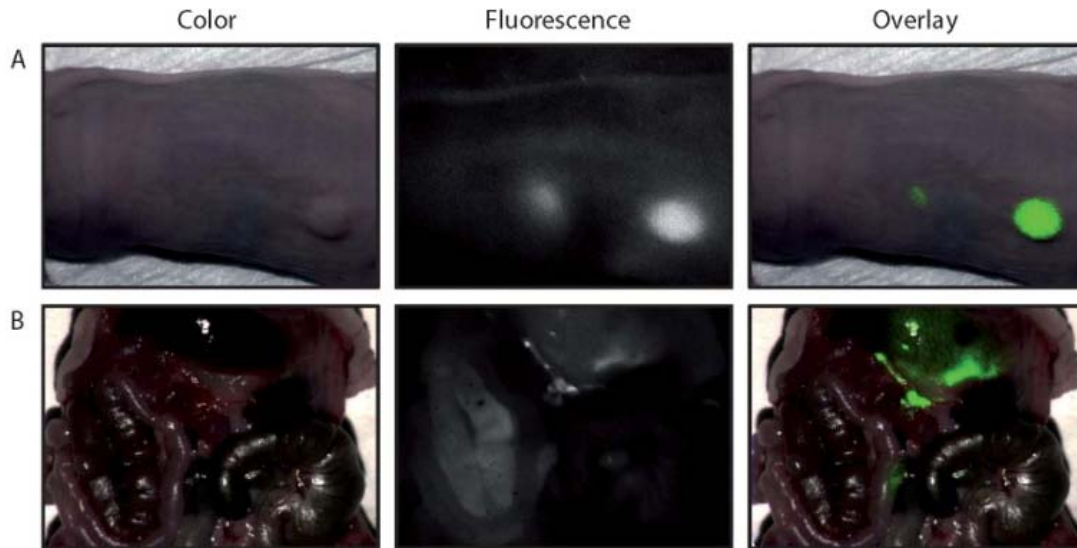

### Supplemental Figure 1

Intra-operative images of trastuzumab-800CW.

A, Representative intra-operative images of mice with sc SK-BR-3 tumor. The breast cancer was targeted with trastuzumab-800CW. B, Images of human ovarian tumor SKOV-3<sup>luc+</sup> ip dissemination model.

Three images are shown in each lane: the color image, the fluorescent image and an overlay of the fluorescence signal in green on top of the color image. The weaker background fluorescence of the stomach comes from the fluorescence of chlorophyll in the food of the animals used in these groups. These mice were not kept on alfalfa-free diet.

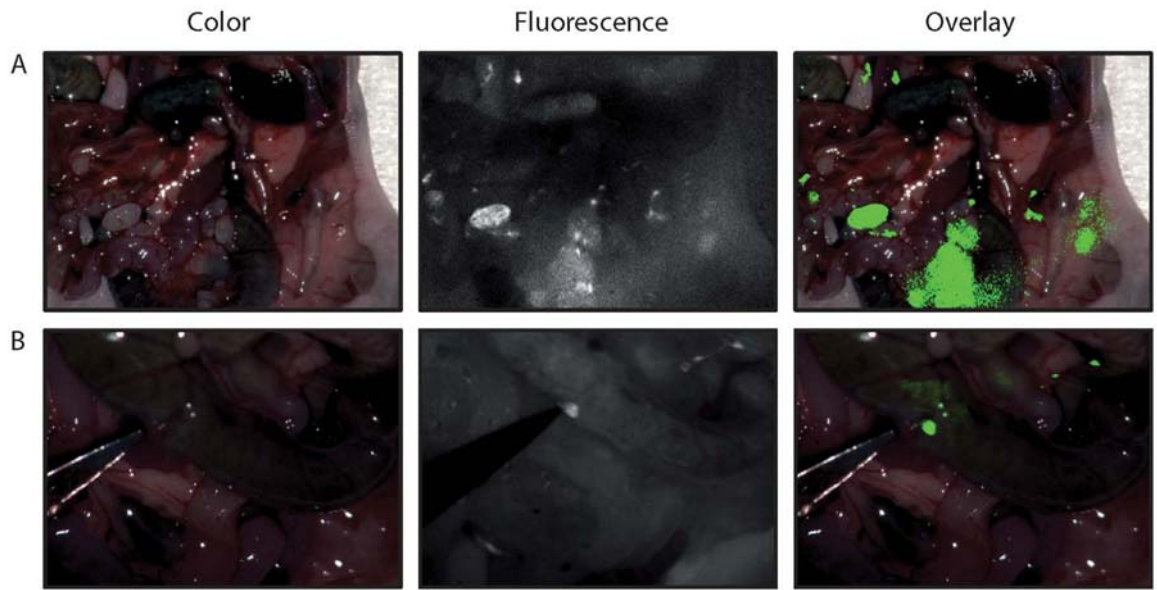

**Supplemental Figure 2**

Intra-operative images of bevacizumab-800CW.

A, Images of A2780 ip dissemination model. B, Images of ovarian tumor SKOV-3<sup>luc+</sup> ip tumor model.

Three images are shown in each lane: the color image, the fluorescent image and an overlay of the fluorescence signal in green on top of the color image.

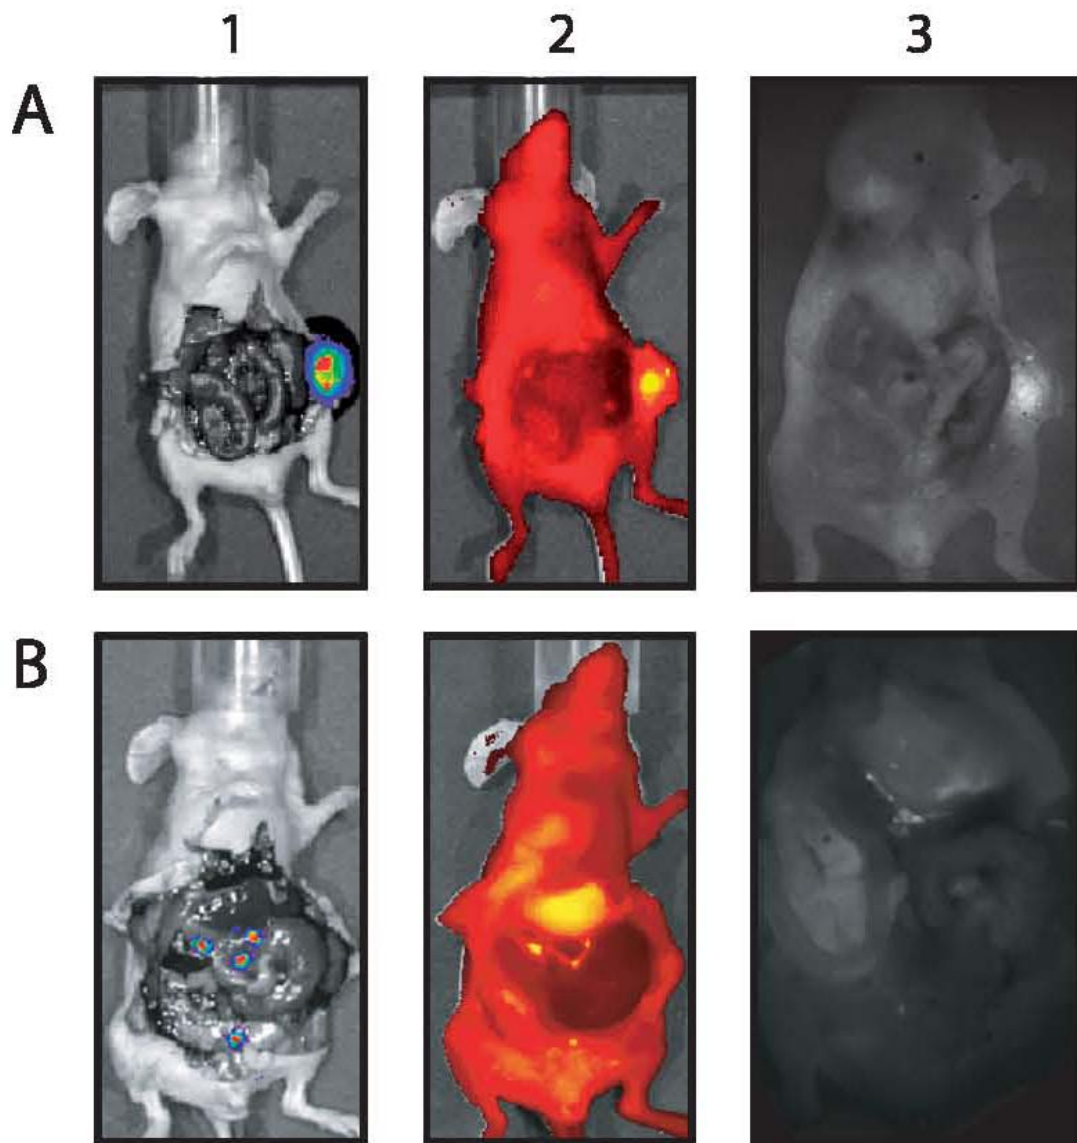

### Supplemental Figure 3

Correlation between bioluminescence and fluorescence signal.

1. Bioluminescence signal measured with IVIS Spectrum. 2. Fluorescence signal measured with IVIS Spectrum. 3. Fluorescence signal measured with intra-operative camera system.

Fluorescent signal is present where vital tumor cells are shown with bioluminescent imaging for both bevacizumab-800CW (A) and trastuzumab-800CW (B).
